## CORRECTION

# Correction: Antiplatelet agents maintain arteriovenous fistula and graft function in patients receiving hemodialysis: A nationwide case-control study

Yung-Ho Hsu, Yu-Chun Yen, Yi-Chun Lin, Li-Chin Sung

There are errors in the author affiliations. The correct affiliations are as follows: Yung-Ho Hsu<sup>1,2</sup>, Yu-Chun Yen<sup>3</sup>, Yi-Chun Lin<sup>3</sup>, Li-Chin Sung<sup>4,5</sup>

**1** Division of Nephrology, Department of Internal Medicine, Shuang Ho Hospital, Taipei Medical University, New Taipei City, Taiwan, **2** Division of Nephrology, Department of Internal Medicine, School of Medicine, College of Medicine, Taipei Medical University, Taipei, Taiwan, **3** Research center of Biostatistics, College of Management, Taipei Medical University, Taipei, Taiwan, **4** Division of Cardiology, Department of Internal Medicine, School of Medicine, College of Medicine, Taipei Medical University, Taipei, Taiwan, **5** Division of Cardiology, Department of Internal Medicine, Shuang Ho Hospital, Taipei Medical University, New Taipei City, Taiwan

## Reference

1. Hsu Y-H, Yen Y-C, Lin Y-C, Sung L-C (2018) Antiplatelet agents maintain arteriovenous fistula and graft function in patients receiving hemodialysis: A nationwide case-control study. PLoS ONE 13(10): e0206011. <https://doi.org/10.1371/journal.pone.0206011> PMID: 30335833

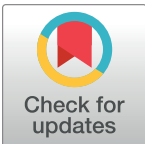

## OPEN ACCESS

**Citation:** Hsu Y-H, Yen Y-C, Lin Y-C, Sung L-C (2019) Correction: Antiplatelet agents maintain arteriovenous fistula and graft function in patients receiving hemodialysis: A nationwide case-control study. PLoS ONE 14(4): e0215546. <https://doi.org/10.1371/journal.pone.0215546>

**Published:** April 17, 2019

**Copyright:** © 2019 Hsu et al. This is an open access article distributed under the terms of the [Creative Commons Attribution License](https://creativecommons.org/licenses/by/4.0/), which permits unrestricted use, distribution, and reproduction in any medium, provided the original author and source are credited.
